# Supplementary material for: Differences in critical thermal maxima and mortality across life stages of the mealworm beetle Tenebrio molitor
Source: Oxford University Press journal article supplement (doi:10.1242/jeb.070342), 2012-06-06
Supplement: jeb070342tables1.pdf [file jeb070342tables1.pdf]

Table S1. Macros used to determine  $CT_{\max}$  from  $\dot{V}_{CO_2}$  data points either as the absolute difference sum (ADS) or as the cessation of spiracular activity (CSA) using Expedata analytical software (Sable Systems International)

| Step                                                                                                                                                                                                                                                                                                                                                                                                                                                                  | Code line                                                       |
|-----------------------------------------------------------------------------------------------------------------------------------------------------------------------------------------------------------------------------------------------------------------------------------------------------------------------------------------------------------------------------------------------------------------------------------------------------------------------|-----------------------------------------------------------------|
| <b>A</b>                                                                                                                                                                                                                                                                                                                                                                                                                                                              |                                                                 |
| 1                                                                                                                                                                                                                                                                                                                                                                                                                                                                     | Create channel                                                  |
| 2                                                                                                                                                                                                                                                                                                                                                                                                                                                                     | Assign title last_channel=ADS                                   |
| 3                                                                                                                                                                                                                                                                                                                                                                                                                                                                     | Active channel 3 ADS                                            |
| 4                                                                                                                                                                                                                                                                                                                                                                                                                                                                     | Transform differentiate all_samples timebase seconds            |
| 5                                                                                                                                                                                                                                                                                                                                                                                                                                                                     | Correction smooth_nearest_neighbor all_samples width 5 repeat 1 |
| 6                                                                                                                                                                                                                                                                                                                                                                                                                                                                     | Transform differentiate all_samples timebase seconds            |
| 7                                                                                                                                                                                                                                                                                                                                                                                                                                                                     | Transform power all_samples exponent 2                          |
| 8                                                                                                                                                                                                                                                                                                                                                                                                                                                                     | Transform absolute_difference_sum all_samples                   |
| <b>B</b>                                                                                                                                                                                                                                                                                                                                                                                                                                                              |                                                                 |
| 1                                                                                                                                                                                                                                                                                                                                                                                                                                                                     | Create channel                                                  |
| 2                                                                                                                                                                                                                                                                                                                                                                                                                                                                     | Assign title last_channel=CSA                                   |
| 3                                                                                                                                                                                                                                                                                                                                                                                                                                                                     | Active channel 3 CSA                                            |
| 4                                                                                                                                                                                                                                                                                                                                                                                                                                                                     | Transform differentiate all_samples timebase seconds            |
| 5                                                                                                                                                                                                                                                                                                                                                                                                                                                                     | Transform power all_samples exponent 2                          |
| (A) To determine ADS, $\dot{V}_{CO_2}$ data were (1–3) first copied into a new channel, which was named and selected as the activate channel. These $\dot{V}_{CO_2}$ data were then (4) differentiated against the time variable, (5) corrected by smoothing, (6) differentiated a second time, and (7) squared to magnify differences between the $CO_2$ signal and electrical noise. From these corrected data (8) the absolute difference sum was then calculated. |                                                                 |
| (B) To determine CSA, the same procedures described above in steps 1–4 and 7 were used.                                                                                                                                                                                                                                                                                                                                                                               |                                                                 |
